# Supplementary material for: Primary-like Human Hepatocytes Genetically Engineered to Obtain Proliferation Competence as a Capable Application for Energy Metabolism Experiments in In Vitro Oncologic Liver Models
Source: MDPI journal article supplement (doi:10.3390/biology11081195), 2022-08-09
Supplement: s1 [file s1]

## Supplementary material

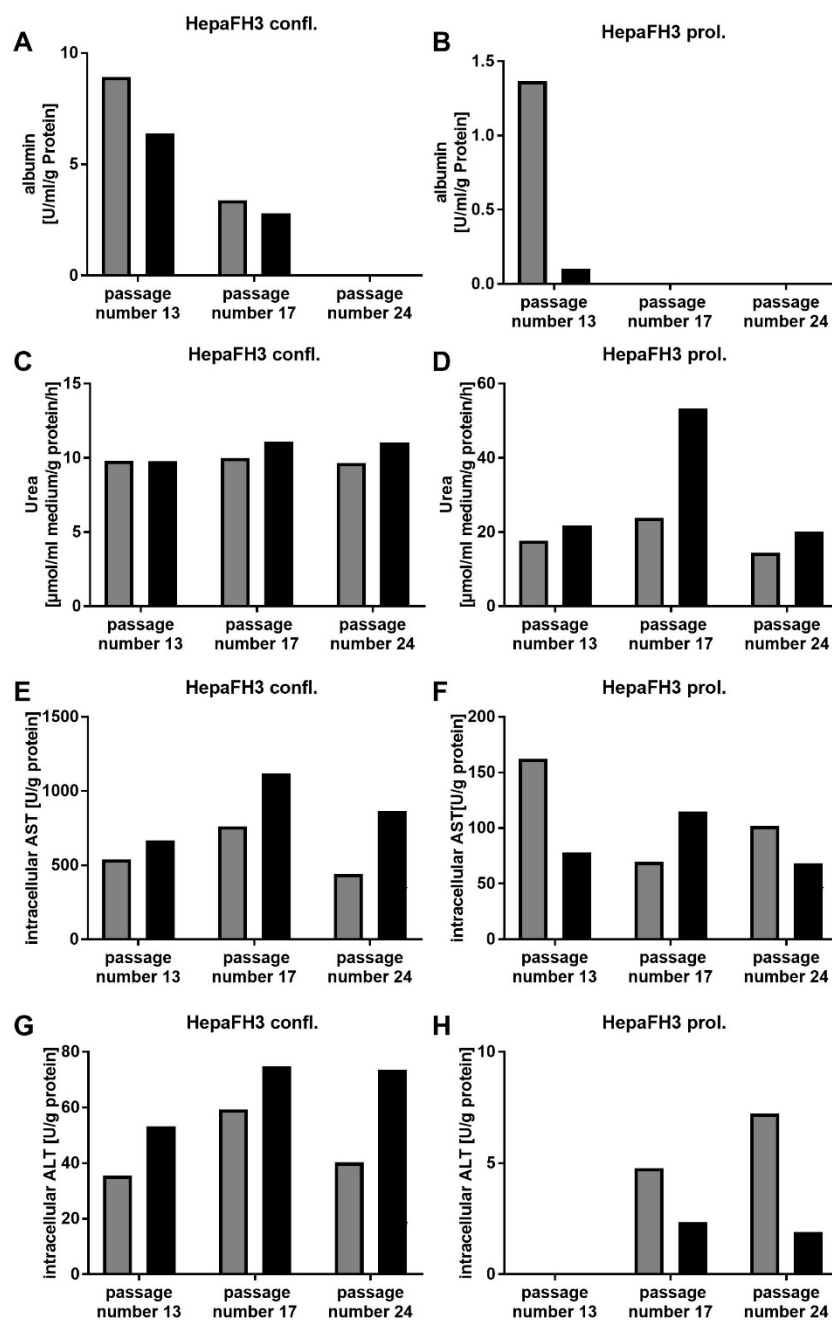

**Figure S1 = Basic hepatocyte markers and their dependence on cell passage number of HepaFH3 cells.** Albumin (A, B), Urea (C, D), intracellular AST (E, F) and intracellular ALT (G, H) for different cell passage numbers of differentiated and proliferating HepaFH3 cells is given. Confl. = confluent, Prol. = proliferating

**A**

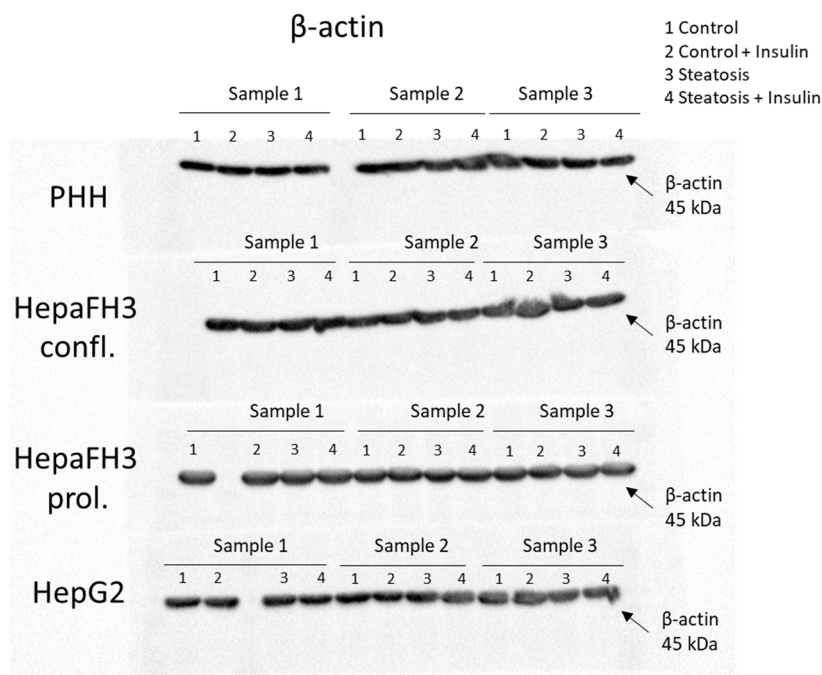

**B**

|          |   | densitometric readings β-actin |                |               |           |
|----------|---|--------------------------------|----------------|---------------|-----------|
|          |   | PHH                            | HepaFH3 confl. | HepaFH3 prol. | HepG2     |
|          |   | DR-Blank                       | DR-Blank       | DR -Blank     | DR -Blank |
| Sample 1 | 1 | 5580876                        | 6190054        | 6249012       | 5173504   |
|          | 2 | 5454512                        | 5587218        | 6510339       | 5367124   |
|          | 3 | 5722752                        | 5981846        | 6400020       | 5451264   |
|          | 4 | 5044172                        | 6345040        | 6214725       | 5126828   |
| Sample 2 | 1 | 5849984                        | 5184816        | 6243864       | 5775196   |
|          | 2 | 5594736                        | 5488210        | 6457671       | 5191508   |
|          | 3 | 5421332                        | 5478096        | 6190008       | 5558700   |
|          | 4 | 6721288                        | 4810234        | 6189579       | 5035100   |
| Sample 3 | 1 | 6494068                        | 5690776        | 6284157       | 5226620   |
|          | 2 | 5854184                        | 6362850        | 6003591       | 5541676   |
|          | 3 | 5404840                        | 5871476        | 5595909       | 4605440   |
|          | 4 | 4619104                        | 5075954        | 5457672       | 5358472   |

**Figure S2 = Western Blot analysis of β-actin (45 kDa) for PHHs, HepaFH3 confl., HepaFH3 prol. and HepG2 cells.** (A) Cell lysates of the different cell types have been separated by SDS-PAGE and blotted on separate membranes. For all cell types, experiments have been performed in triplicates. (B) Densitometric readings (DR) for every band is depicted. Blank of an empty line has been deducted from the DR. Exposure time = 17 sec for all blots. PageRuler™ Prestained Protein Ladder, 10-180 kDa from Thermo Fisher was used as protein ladder. Confl. = confluent, Prol. = proliferating, DR = densitometric reading.

**A**

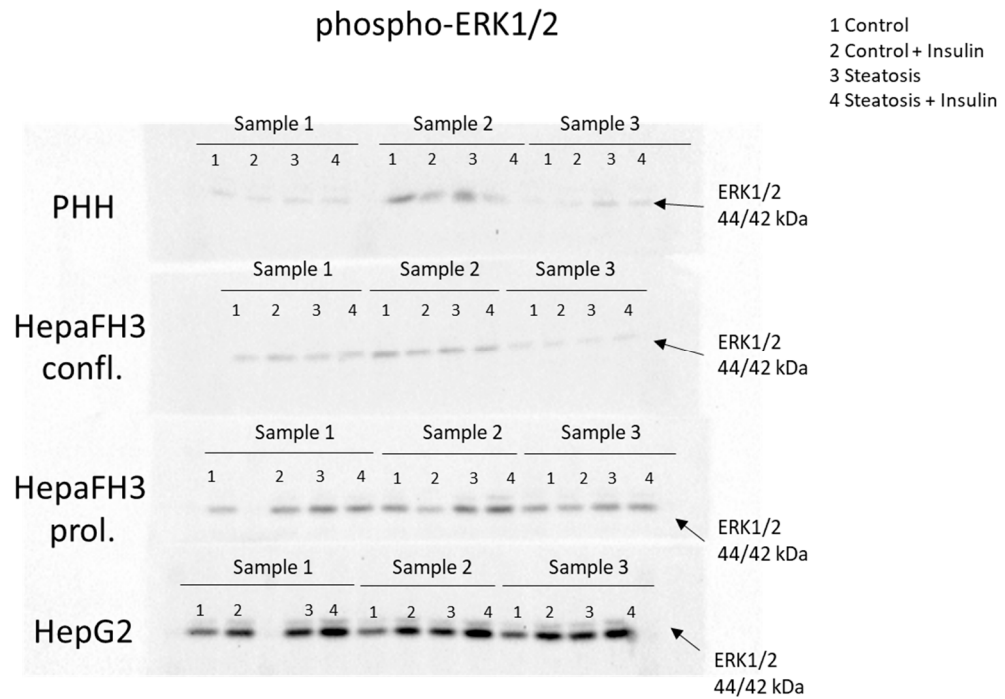

**B**

|             |   | densitometric readings pERK |                   |                  |               |
|-------------|---|-----------------------------|-------------------|------------------|---------------|
|             |   | PHH                         | HepaFH3<br>confl. | HepaFH3<br>prol. | HepG2         |
|             |   | DR-<br>Blank                | DR-Blank          | DR -Blank        | DR -<br>Blank |
| Sample<br>1 | 1 | 393680                      | 530504            | 660786           | 1004402       |
|             | 2 | 294210                      | 1010061           | 1166116          | 1598940       |
|             | 3 | 398188                      | 774150            | 1613472          | 1701336       |
|             | 4 | 362530                      | 926263            | 1419264          | 2558374       |
| Sample<br>2 | 1 | 2143736                     | 1658592           | 1245426          | 1103984       |
|             | 2 | 1361388                     | 1080001           | 563388           | 1802794       |
|             | 3 | 2206106                     | 1413633           | 1575896          | 1557262       |
|             | 4 | 786758                      | 1184222           | 2438590          | 2604448       |
| Sample<br>3 | 1 | 65226                       | 409097            | 1017982          | 1136310       |
|             | 2 | 157612                      | 293111            | 791392           | 1921332       |
|             | 3 | 711662                      | 212849            | 1359512          | 1747788       |
|             | 4 | 295498                      | 314301            | 1278158          | 2430316       |

**Figure S3 = Western Blot analysis of pERK1/2 (44/42 kDa) for PHHs, HepaFH3 confl., HepaFH3 prol. and HepG2 cells. (A)** Cell lysates of the different cell types have been separated by SDS-PAGE and blotted on separate membranes. For all cell types, experiments have been performed in triplicates. **(B)** Densitometric readings (DR) for every band is depicted. Blank of an empty line has been deducted from the DR. Exposure time = 335.5 sec for PHHs, 416.9 sec for HepaFH3 confl., 213.4 sec for HepaFH3 prol., 91.4 sec for HepG2. PageRuler™ Prestained Protein Ladder, 10-180 kDa from Thermo Fisher was used as protein ladder. Confl. = confluent, Prol. = proliferating, DR = densitometric reading.

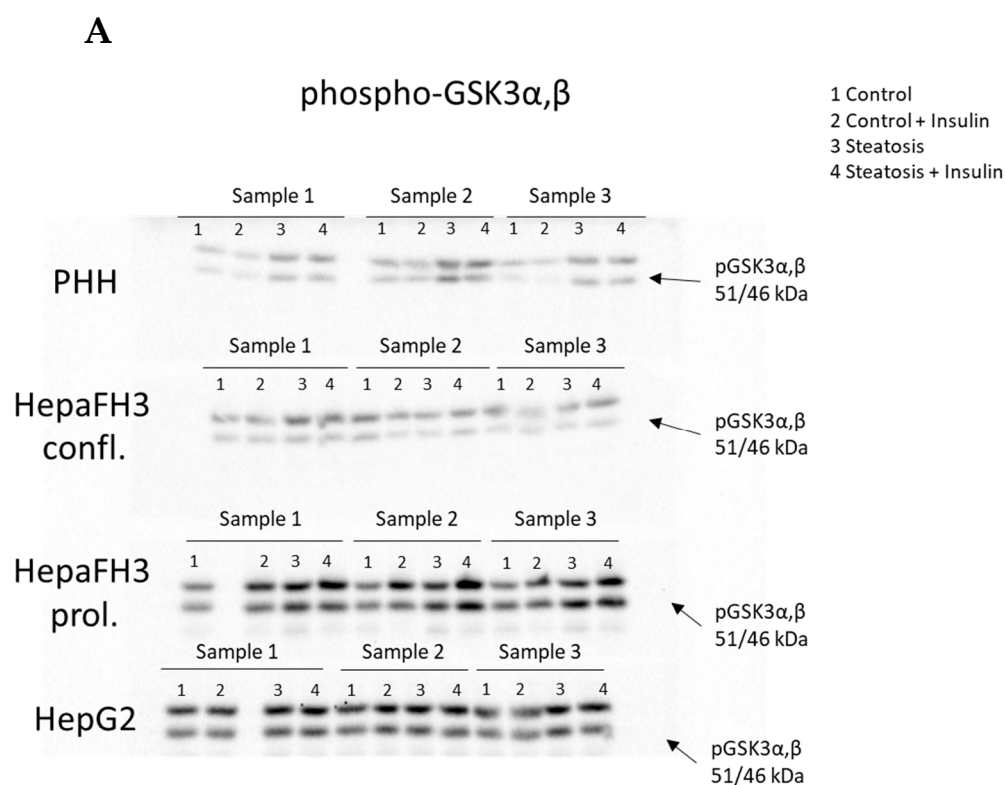

**B**

|          |   | densitometric readings pGSK $\alpha$ , $\beta$ |                |               |            |
|----------|---|------------------------------------------------|----------------|---------------|------------|
|          |   | PHH                                            | HepaFH3 confl. | HepaFH3 prol. | HepG2      |
|          |   | DR-Blank                                       | DR-Blank       | DR -Blank     | DR - Blank |
| Sample 1 | 1 | 498180                                         | 952000         | 832176        | 1214568    |
|          | 2 | 448860                                         | 1061970        | 1287872       | 1285112    |
|          | 3 | 1193947,5                                      | 1620626        | 1488616       | 1427584    |
|          | 4 | 1123357,5                                      | 1473507        | 1677568       | 1465552    |
| Sample 2 | 1 | 879825                                         | 1529955        | 862016        | 1261984    |
|          | 2 | 1037542,5                                      | 853951         | 1295192       | 1295280    |
|          | 3 | 2066775                                        | 824355         | 1272296       | 1375008    |
|          | 4 | 1797592,5                                      | 1080527        | 2079552       | 1413944    |
| Sample 3 | 1 | 679575                                         | 902132         | 962096        | 1042984    |
|          | 2 | 376950                                         | 970375         | 1178064       | 1180664    |
|          | 3 | 1312117,5                                      | 708064         | 1539816       | 1441896    |
|          | 4 | 1196100                                        | 1275232        | 1690936       | 1366936    |

**Figure S4 = Western Blot analysis of pGSK $\alpha$ , $\beta$  (51/46 kDa) for PHHs, HepaFH3 confl., HepaFH3 prol. and HepG2 cells. (A)** Cell lysates of the different cell types have been separated by SDS-PAGE and blotted on separate membranes. For all cell types, experiments have been performed in triplicates. **(B)** Densitometric readings (DR) for every band is depicted. Blank of an empty line has been deducted from the DR. Exposure time = 141.4 sec for PHHs, 141.4 sec for HepaFH3 confl., 50.3 sec for HepaFH3 prol., 50.3 sec for HepG2. PageRuler™ Prestained Protein Ladder, 10-180 kDa from Thermo Fisher was used as protein ladder. Confl. = confluent, Prol. = proliferating, DR = densitometric reading.

**A**

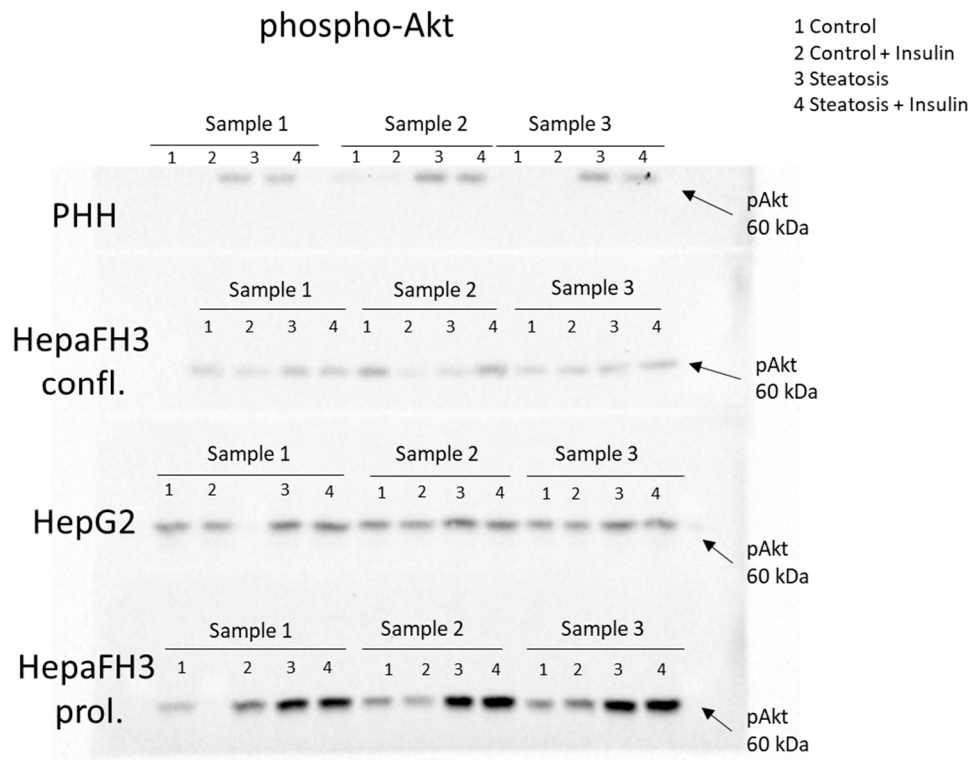

**B**

|          |   | densitometric readings pAkt |                |               |           |
|----------|---|-----------------------------|----------------|---------------|-----------|
|          |   | PHH                         | HepaFH3 confl. | HepaFH3 prol. | HepG2     |
|          |   | DR-Blank                    | DR-Blank       | DR -Blank     | DR -Blank |
| Sample 1 | 1 | 0                           | 1134140        | 325935        | 325935    |
|          | 2 | 0                           | 682696         | 903825        | 903825    |
|          | 3 | 1479422                     | 1382388        | 1747080       | 1747080   |
|          | 4 | 1268274                     | 1185282        | 1798095       | 1798095   |
| Sample 2 | 1 | 292712                      | 2055564        | 568035        | 568035    |
|          | 2 | 139020                      | 387268         | 430545        | 430545    |
|          | 3 | 2347254                     | 746788         | 1930155       | 1930155   |
|          | 4 | 1926582                     | 2073988        | 2473500       | 2473500   |
| Sample 3 | 1 | 0                           | 877086         | 579390        | 579390    |
|          | 2 | 0                           | 991662         | 832470        | 832470    |
|          | 3 | 2163182                     | 1031814        | 2177550       | 2177550   |
|          | 4 | 1673000                     | 1431024        | 2415315       | 2415315   |

**Figure S5= Western Blot analysis of pAkt (60 kDa) for PHHs, HepaFH3 confl., HepaFH3 prol. and HepG2 cells.**

(A) Cell lysates of the different cell types have been separated by SDS-PAGE and blotted on separate membranes. For all cell types, experiments have been performed in triplicates. (B) Densitometric readings (DR) for every band is depicted. Blank of an empty line has been deducted from the DR. Exposure time = 266.2 sec for PHHs, 266.2 sec for HepaFH3 confl., 55.2 sec for HepaFH3 prol., 55.2 sec for HepG2. *PageRuler™ Prestained Protein Ladder, 10-180 kDa from Thermo Fisher* was used as protein ladder. Confl. = confluent, Prol. = proliferating, DR = densitometric reading.

**A**

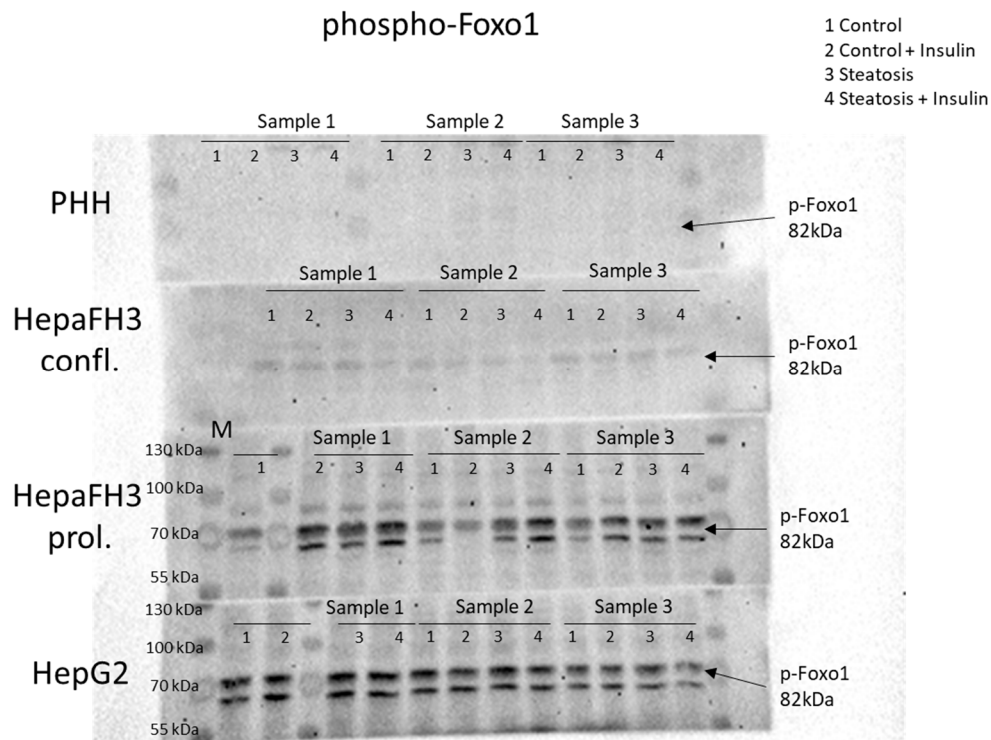

**B**

|          |   | densitometric readings pFoxo1 |                |               |           |
|----------|---|-------------------------------|----------------|---------------|-----------|
|          |   | PHH                           | HepaFH3 confl. | HepaFH3 prol. | HepG2     |
|          |   | DR-Blank                      | DR-Blank       | DR -Blank     | DR -Blank |
| Sample 1 | 1 | 13286                         | 203775         | 505980        | 636847,5  |
|          | 2 | 0                             | 178425         | 1012845       | 924442,5  |
|          | 3 | 27174                         | 184020         | 830557,5      | 717727,5  |
|          | 4 | 9254                          | 24465          | 1145902,5     | 941692,5  |
| Sample 2 | 1 | 0                             | 15030          | 569430        | 667890    |
|          | 2 | 0                             | 49920          | 291510        | 577702,5  |
|          | 3 | 48132                         | 0              | 795037,5      | 764977,5  |
|          | 4 | 149548                        | 0              | 819870        | 538117,5  |
| Sample 3 | 1 | 0                             | 189120         | 541380        | 427455    |
|          | 2 | 0                             | 187740         | 559755        | 476587,5  |
|          | 3 | 291004                        | 195285         | 580335        | 488175    |
|          | 4 | 98476                         | 52020          | 798082,5      | 329692,5  |

**Figure S6= Western Blot analysis of pFoxo1 (82 kDa) for PHHs, HepaFH3 confl., HepaFH3 prol. and HepG2 cells. (A)** Cell lysates of the different cell types have been separated by SDS-PAGE and blotted on separate membranes. For all cell types, experiments have been performed in triplicates. **(B)** Densitometric readings (DR) for every band is depicted. Blank of an empty line has been deducted from the DR. Exposure time = 600 sec for all blots. PageRuler™ Prestained Protein Ladder, 10-180 kDa from Thermo Fisher was used as protein ladder. Confl. = confluent, Prol. = proliferating, DR = densitometric reading, M = marker.
